# Supplementary material for: Exploring the Participation Patterns and Impact of Environment in Preschool Children with ASD
Source: MDPI journal article supplement (doi:10.3390/ijerph17165677), 2020-08-06
Supplement: s1 [file s1]

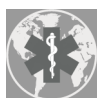

**Table S1.** Percentage of children’s participation frequency and level of involvement.

| Type of Activity                    |                                               | Frequency                                                                      | Level of Involvement                                                |
|-------------------------------------|-----------------------------------------------|--------------------------------------------------------------------------------|---------------------------------------------------------------------|
| Basic care routines                 | Getting rest                                  | 82.7% participate daily                                                        | 56% somewhat involved<br>30% very involved                          |
|                                     | Personal care management                      | 86.5% participate daily                                                        | 56.9% somewhat involved<br>19.6% very involved                      |
|                                     | Getting clean                                 | 73.1% participate daily<br>21.1% a few times a week                            | 18% not very involved<br>52% somewhat involved<br>18% very involved |
|                                     | Mealtime                                      | 84.6% participate daily                                                        | 44.9% somewhat involved<br>36.7% very involved                      |
| Home Household chores               | Cleaning up                                   | 15.4% never participated                                                       | 20.9% not very involved                                             |
|                                     |                                               | 38.5% a few times a week                                                       | 55.8% somewhat involved                                             |
|                                     |                                               | 21.2% participate daily                                                        | 11.6% very involved                                                 |
|                                     | Meal preparation                              | 58.8% never participated                                                       | 39.3% not very involved                                             |
|                                     |                                               | 11.8% once a week                                                              | 21.4% somewhat involved                                             |
|                                     |                                               |                                                                                | 28.6% very involved                                                 |
| Taking care of other family members | 64.7% never participated<br>11.8% once a week | 36% not very involved<br>40% somewhat involved                                 |                                                                     |
| Laundry & dishes                    | 62.8% never participated<br>11.8% once a week | 38.5% not very involved<br>30.8% very involved                                 |                                                                     |
| Interactive & organized play        | Art, craft, stories, music                    | 63.5% daily                                                                    | 26% somewhat involved<br>62% very involved                          |
|                                     | Screen time                                   | 98% daily                                                                      | 88.2% very involved                                                 |
|                                     | Indoor play & games                           | 88.5% daily                                                                    | 30.8% somewhat involved<br>65.4% very involved                      |
| Socializing with friends & family   | Celebrations at home                          | 44.2% a few times in the last four months<br>19.2% few times in the last month | 31.4% not very involved<br>37.3% somewhat involved                  |

|                                  |                                                 |                                                                                                |                                                                           |
|----------------------------------|-------------------------------------------------|------------------------------------------------------------------------------------------------|---------------------------------------------------------------------------|
|                                  | Houseguests                                     | 19.2% never participated<br>26.9% a few times in the last month                                | 23.9% not very involved<br>37% somewhat involved<br>26.1% very involved   |
|                                  | Shopping & errands                              | 32.1% once a week<br>34% a few times a week                                                    | 22% not very involved<br>56% somewhat involved<br>16% very involved       |
| Neighborhood & community outings | Dining out                                      | 20.8% never<br>24.5% a few times in the last month                                             | 25.6% not very involved<br>51.2% somewhat involved                        |
|                                  | Routine appointments                            | 7.5% never<br>24.5% once in the last four months<br>26.4% few times in the last four months    | 35.4% not very involved<br>45.8% somewhat involved                        |
| Classes & groups                 | Classes & lessons                               | 64.7% never<br>13.7% once a week                                                               | 42.9% somewhat involved<br>33.3% very involved                            |
|                                  | Organized physical activities                   | 73.4% never<br>12.2% once a week                                                               | 27.8% not very involved<br>44.4% very involved                            |
| Community                        | Community attractions                           | 21.2% never<br>21.2% few times in the last four months<br>17.3% once in the last month         | 48.7% somewhat involved<br>20.5% very involved                            |
|                                  | Religious or spiritual gatherings or activities | 82.7% never<br>9.6% once a week                                                                | 38.5% not very involved<br>30.8% somewhat involved<br>23.1% very involved |
|                                  | Social gatherings                               | 7.8% never<br>29.4% a few times in the last four months<br>25.5% a few times in the last month | 27.5% not very involved<br>40% somewhat involved<br>27.5% very involved   |
|                                  | Community events                                | 29.4% never<br>23.5% once in the last four months<br>21.6% few times in the last four months   | 26.5% not very involved<br>35.3% somewhat involved<br>26.5% very involved |
| Recreational activities & trips  | Unstructured activities                         | 26.9% few times in the last month<br>32.7% few times a week                                    | 32.7% somewhat involved<br>65.3% very involved                            |
|                                  | Overnight visits or trips                       | 42.3% never                                                                                    | 42.9% somewhat involved                                                   |

---

|  |                                              |                       |
|--|----------------------------------------------|-----------------------|
|  | 32.7%once in the last<br>four months         | 39.3%very<br>involved |
|  | 13.5% a few times in<br>the last four months |                       |

---
